# Supplementary figures and images for: Distribution and Characteristics of Bacteria Isolated from Cystic Fibrosis Patients with Pulmonary Exacerbation
Source: Hindawi journal article supplement (doi:10.1155/2022/5831139), 2022-12-24

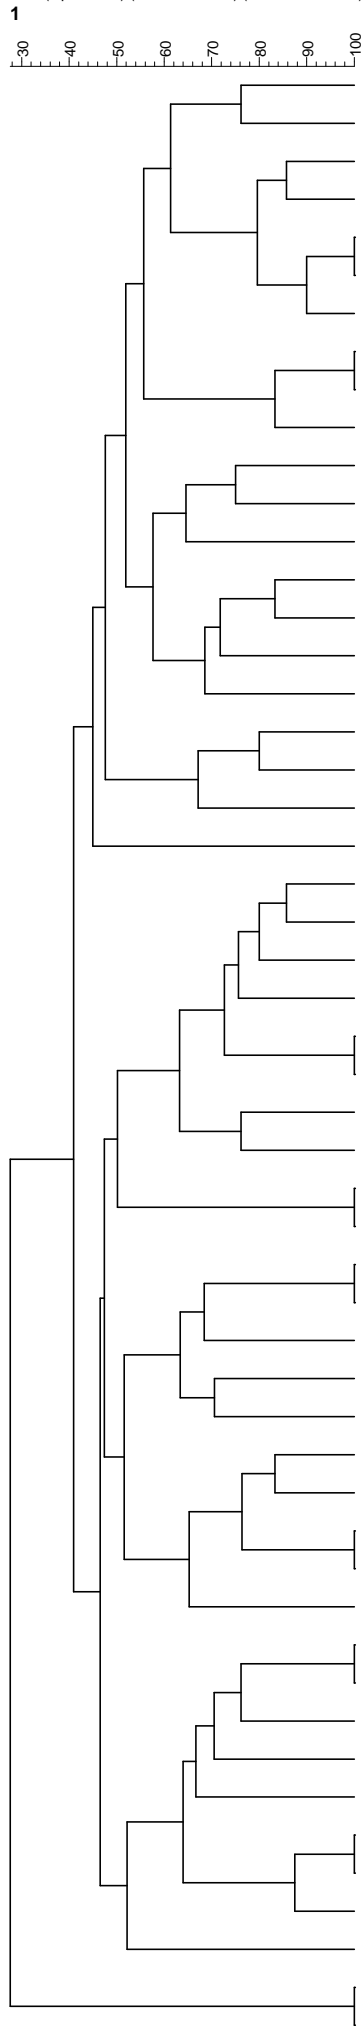

1

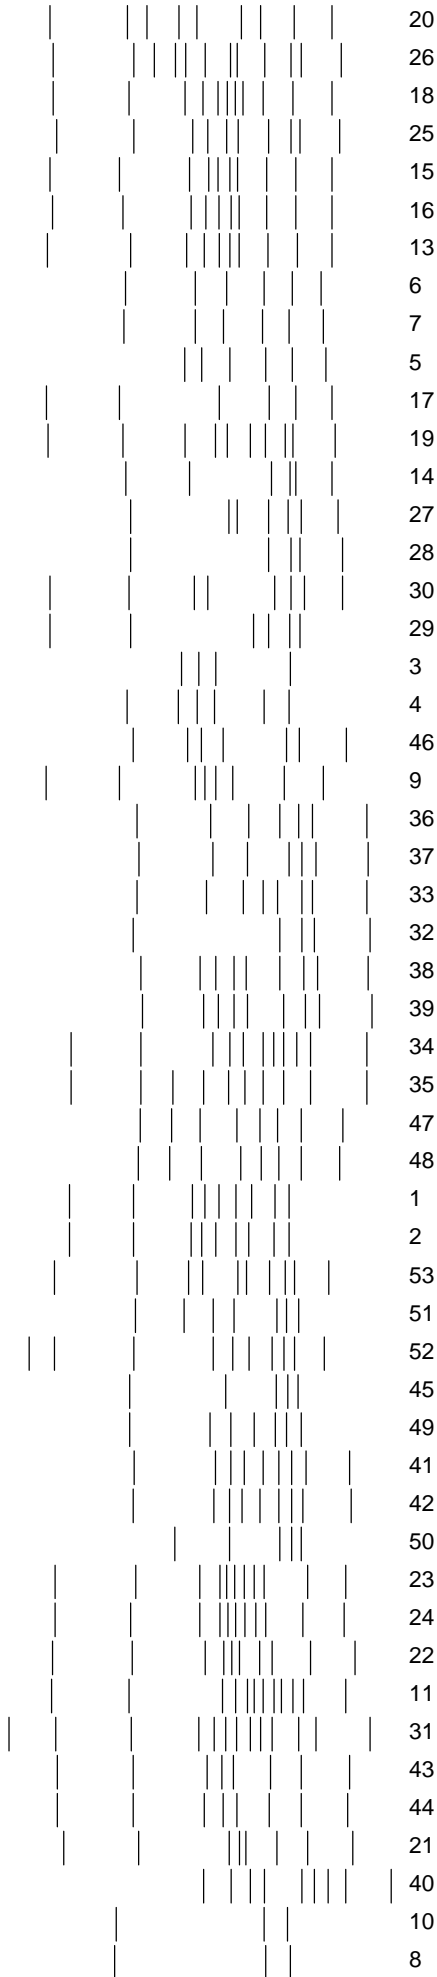

Supplement: f1 [file 5831139.f1.zip]
